# Supplementary material for: High thermoelectric performance based on CsSnI3 thin films with improved stability
Source: Royal Society of Chemistry journal article supplement (doi:10.1039/d1ta11093d), 2022-01-01
Supplement: d1ta11093d1.pdf [file d1ta11093d1.pdf]

## SUPPORTING INFORMATION

### Supporting Information for

### High thermoelectric performance based on CsSnI<sub>3</sub> thin films with improved stability

*Weidong Tang,<sup>a</sup> Tianjun Liu<sup>a</sup> and Oliver Fenwick<sup>a\*</sup>*

*<sup>a</sup> School of Engineering and Materials Science, Queen Mary University of  
London, Mile End Road, London E1 4NS, United Kingdom;*

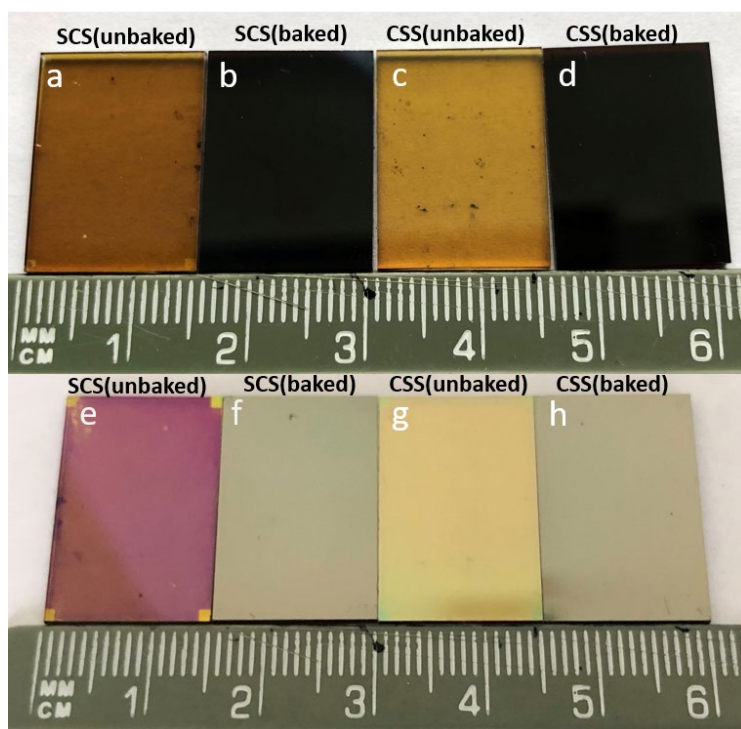

**Figure S1.** Optical images of the two types  $\text{CsSnI}_3$  thin films before and after annealing steps. (a-d) Back-lit films and (e-h) front-lit films.

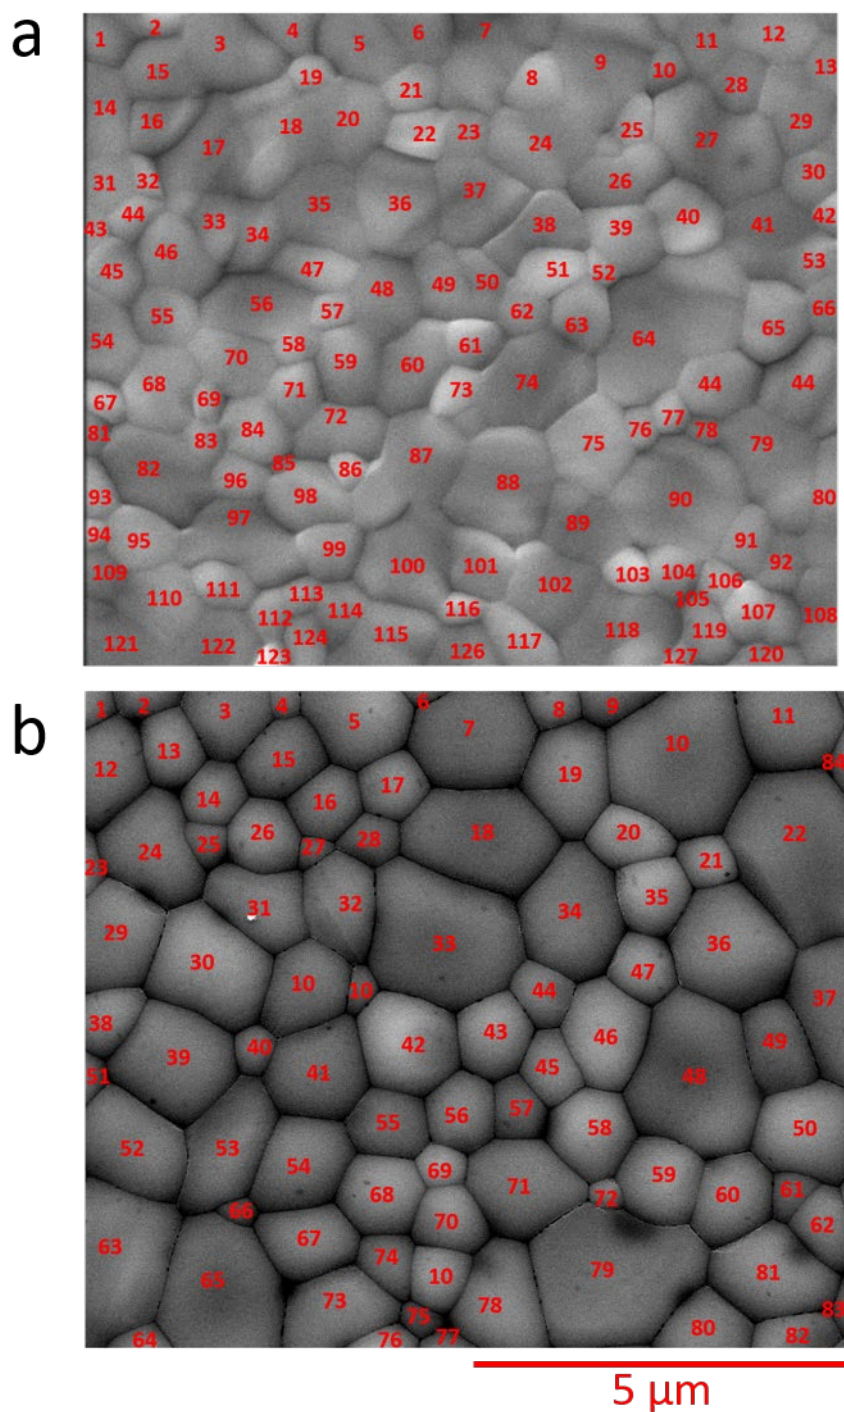

**Figure S2.** Grain counts and average grain size calculation of  $\text{CsSnI}_3$  thin films **(a)** CSS and **(b)** SCS.

$$\text{The average grain size} = \frac{\text{total area}}{\text{total number}}$$

$$\text{The average grain size of SCS} = 1.06 \mu\text{m}^2$$

$$\text{The average grain size of CSS} = 0.71 \mu\text{m}^2$$

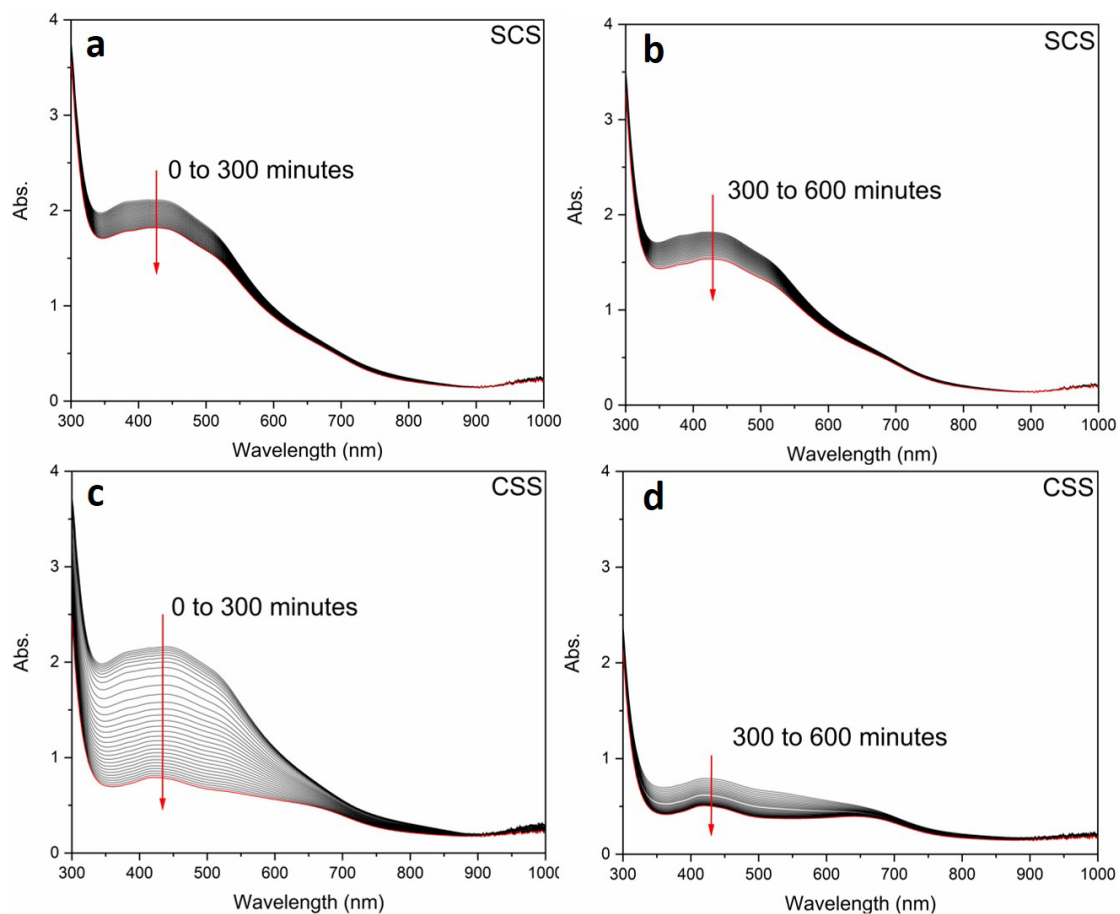

**Figure S3. UV-vis absorption spectra of the two types  $\text{CsSnI}_3$  thin films.** Time dependent UV-vis absorption spectra of SCS  $\text{CsSnI}_3$  thin films **(a)** from 0 to 300 minutes and **(b)** from 300 to 600 minutes. Time dependent UV-vis absorption spectra of CSS  $\text{CsSnI}_3$  thin films **(c)** from 0 to 300 minutes and **(d)** from 300 to 600 minutes.

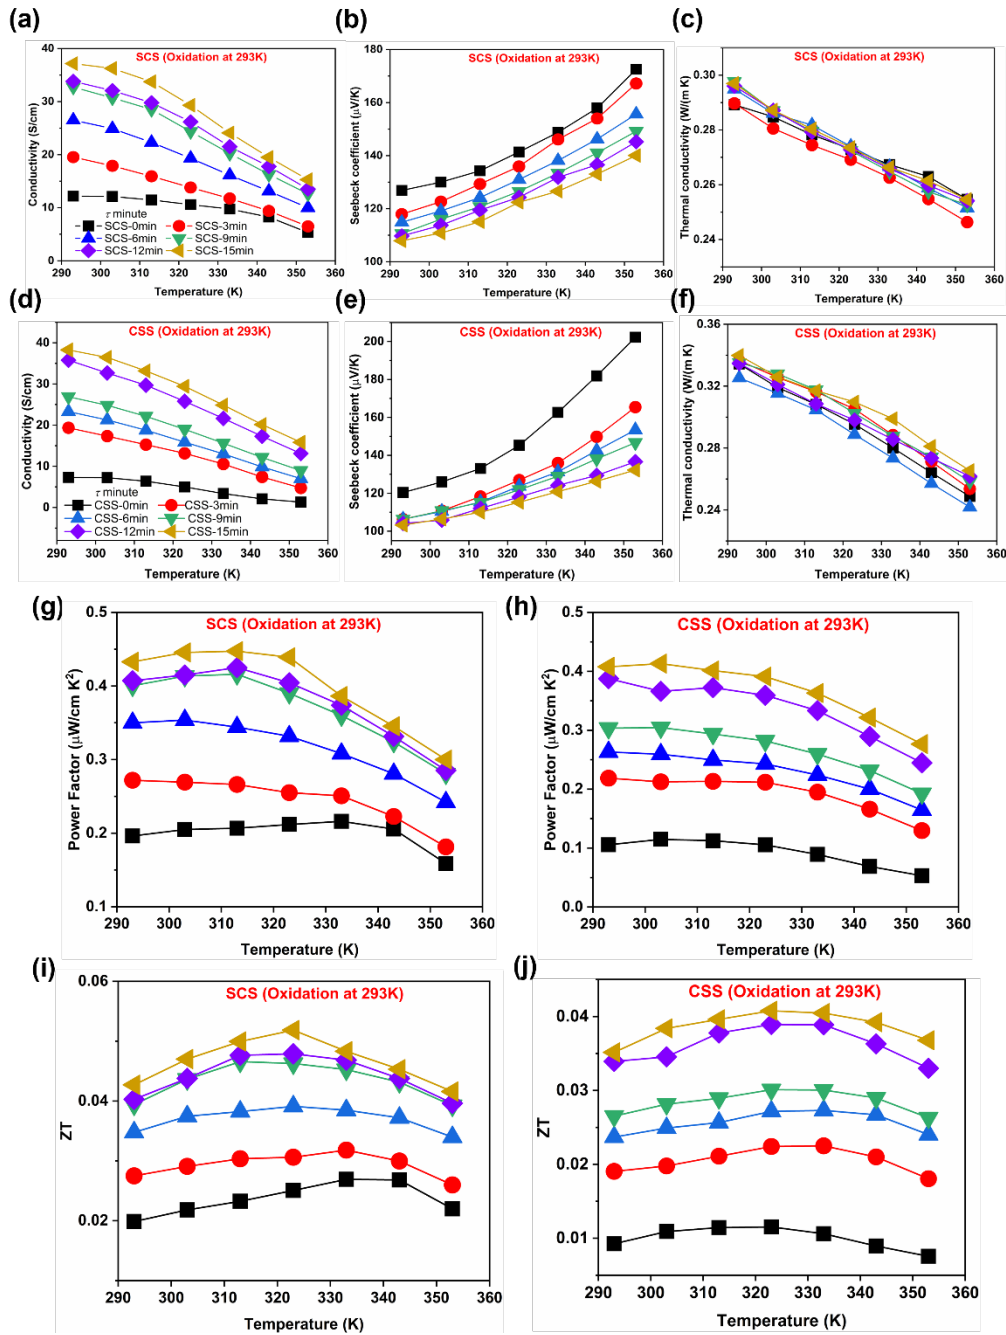

**Figure S4.** Thermoelectric properties of the two types  $\text{CsSnI}_3$  thin films oxidised at 20 °C. Temperature dependent electrical conductivity,  $\sigma$  (a), Seebeck coefficient,  $S$  (b), thermal conductivity,  $\kappa_{\text{total}}$  (c), power factor, PF (g) and figure-of-merit,  $zT$  (i), of SCS  $\text{CsSnI}_3$  thin films with air exposure at 20 °C. Temperature dependent electrical conductivity,  $\sigma$  (d), Seebeck coefficient,  $S$  (e), thermal conductivity,  $\kappa_{\text{total}}$  (f), power factor, PF (h) and figure-of-merit,  $zT$  (j) of CSS  $\text{CsSnI}_3$  thin films with air exposure at 20 °C.

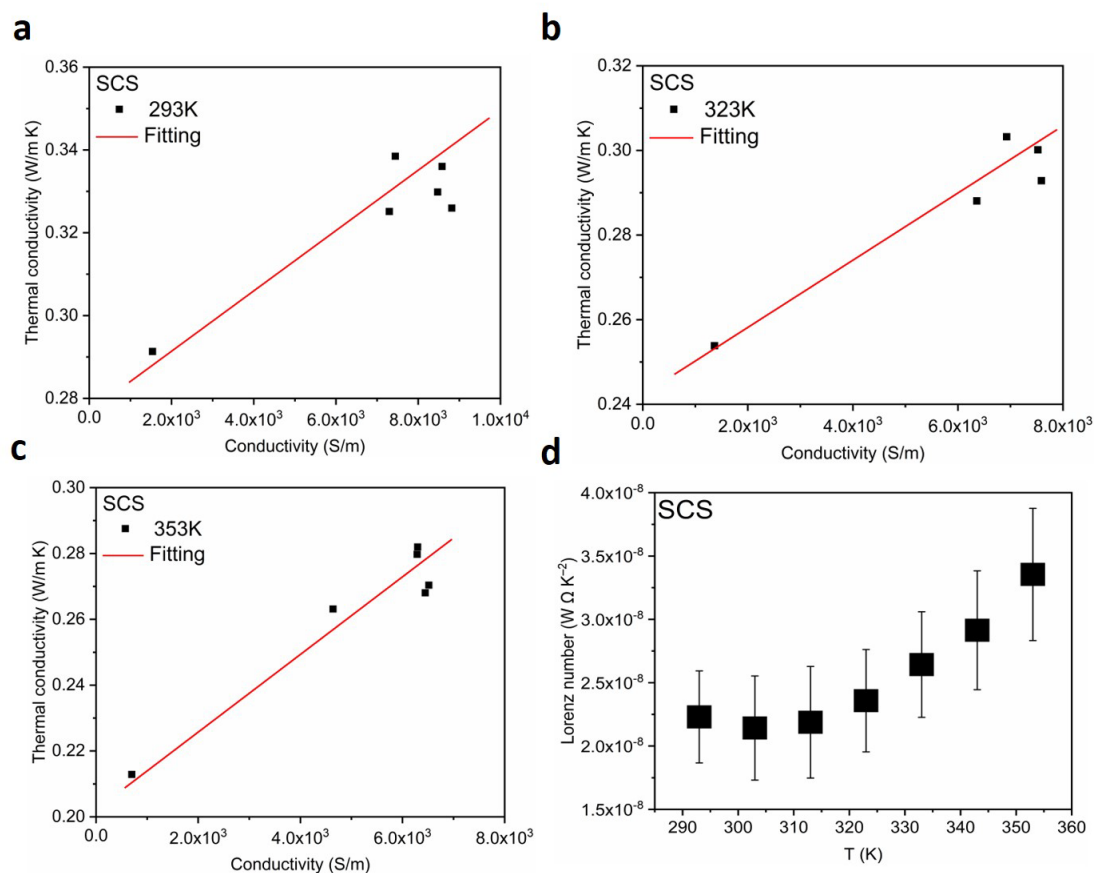

**Figure S5.** The relationship between thermal conductivity (total) and electrical conductivity of SCS  $\text{CsSnI}_3$  thin films. **(a-c)** The total thermal conductivity as a function of electrical conductivity with linear fitting at 293 K, 323 K and 353 K. **(d)** Temperature dependence of Lorenz number from 293 K to 353 K.

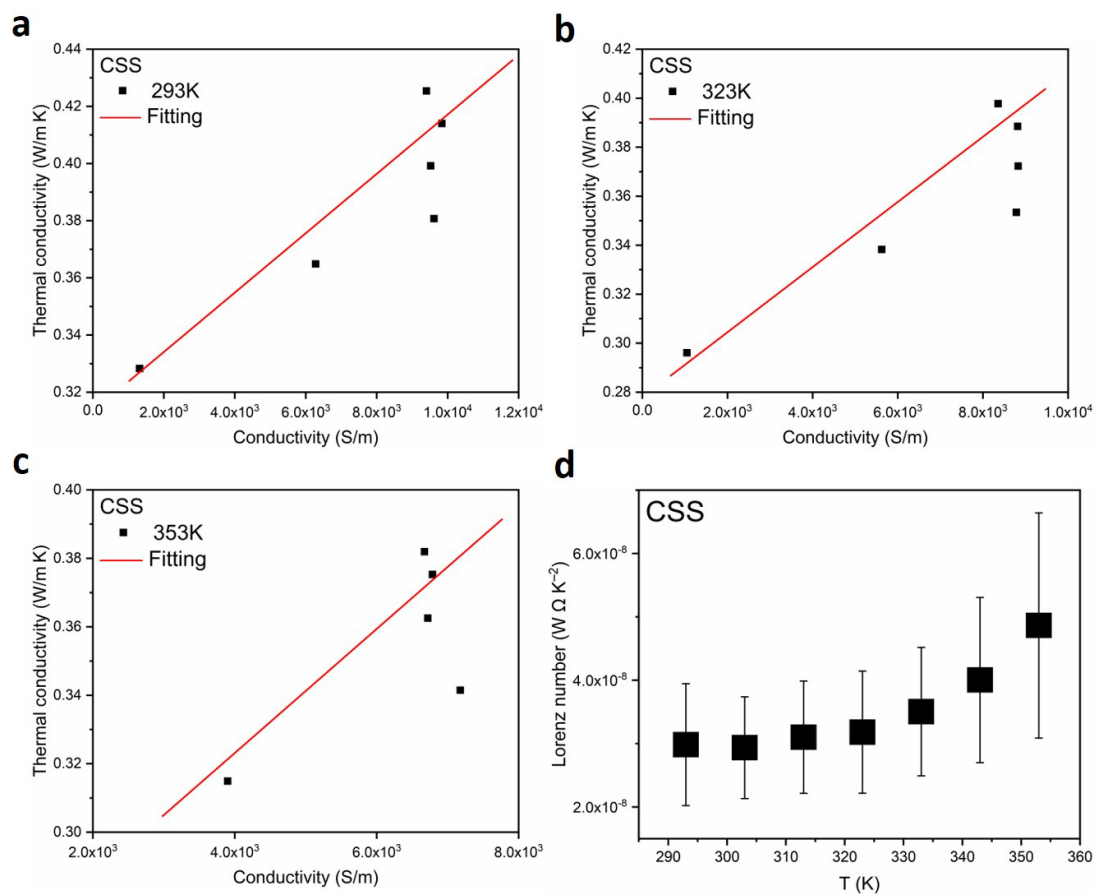

**Figure S6.** The relationship between thermal conductivity (total) and electrical conductivity of CSS  $\text{CsSnI}_3$  thin films. **(a-c)** The total thermal conductivity as a function of electrical conductivity with linear fitting at 293 K, 323 K and 353 K. **(d)** Temperature dependence of Lorenz number from 293 K to 353 K.



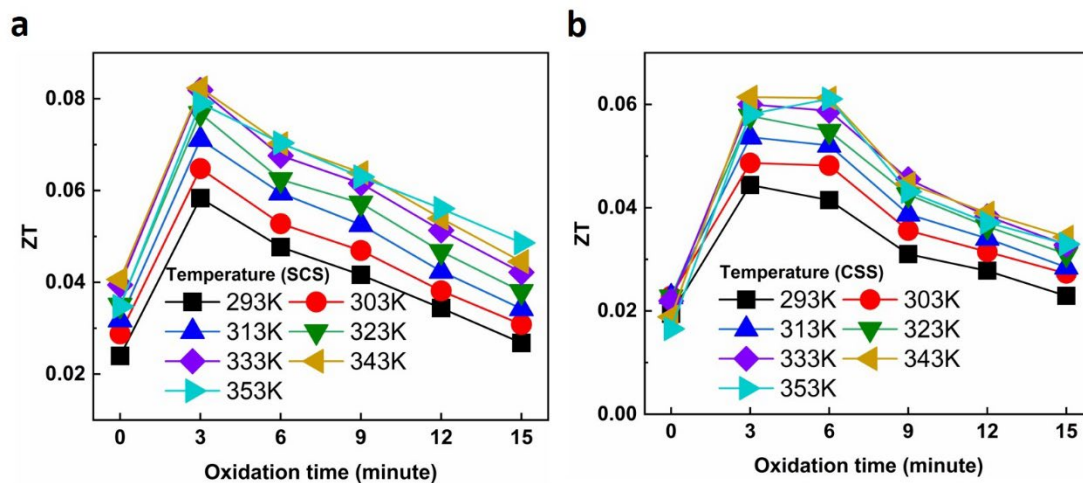

Figure S7. The Figure of merit,  $zT$ , stability measurement of  $\text{CsSnI}_3$  thin films oxidised at  $80^\circ\text{C}$ . (a)  $zT$  of a SCS film and (b)  $zT$  of a CSS film.



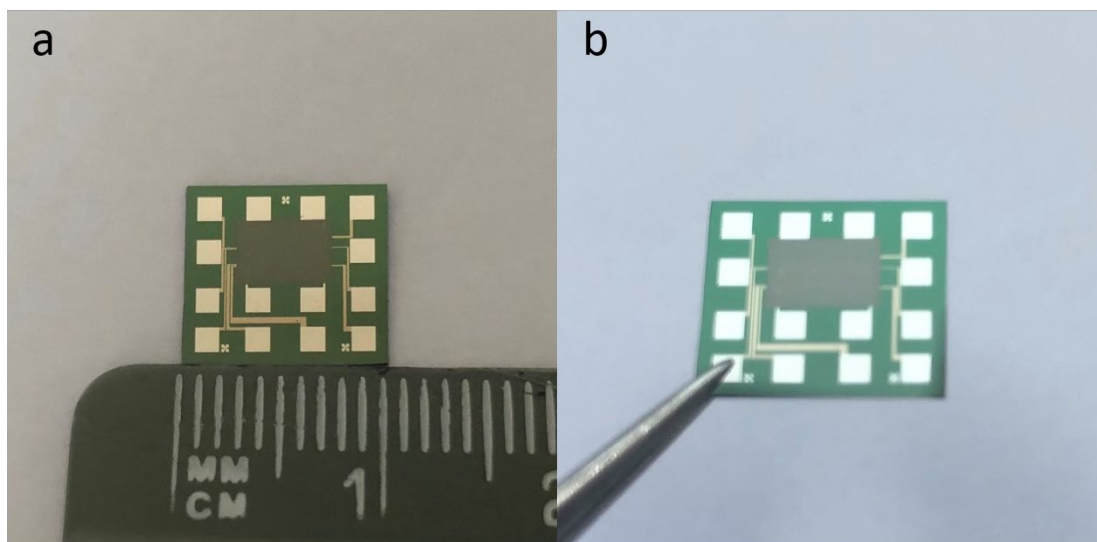

Figure S8. Images of thermoelectrical property measurement chips with deposited  $\text{CsSnI}_3$  thin films.

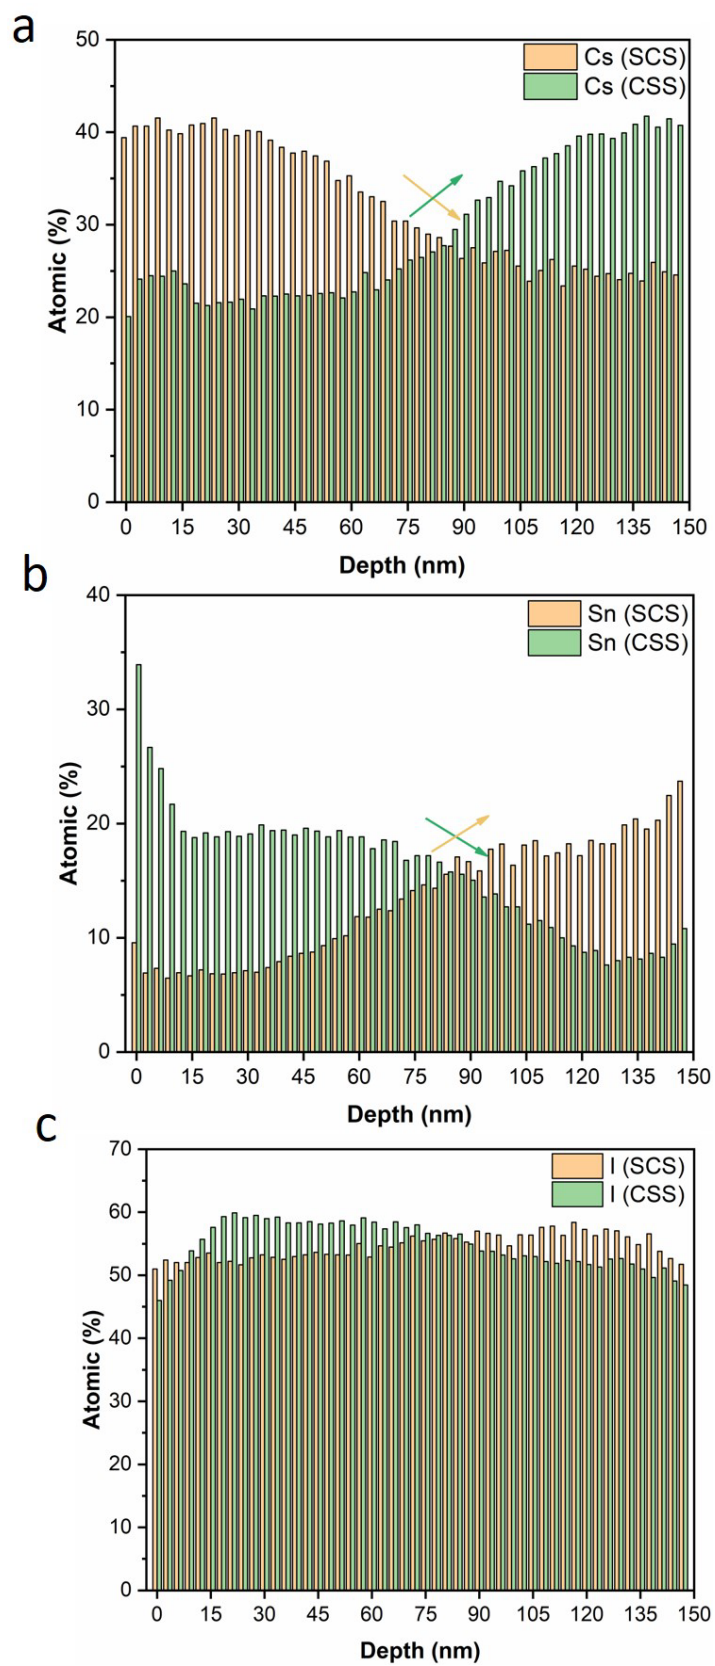

Figure S9. XPS depth profile of elemental concentration for  $\text{CsSnI}_3$  thin films (from 0 to 150 nm). (a) Cesium (b) Tin (c) Iodide.

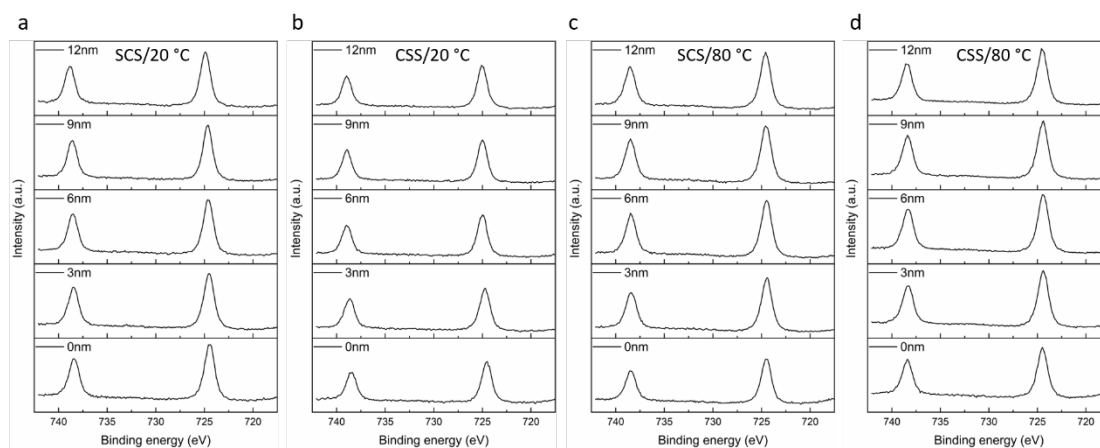

**Figure S10. XPS depth profile of Cs 3d (Caesium) for  $\text{CsSnI}_3$  thin films (from 0 to 12 nm). (a) SCS film oxidised at 20 °C (b) CSS film oxidised at 20 °C (c) SCS oxidised at 80 °C (d) CSS oxidised at 80 °C.**

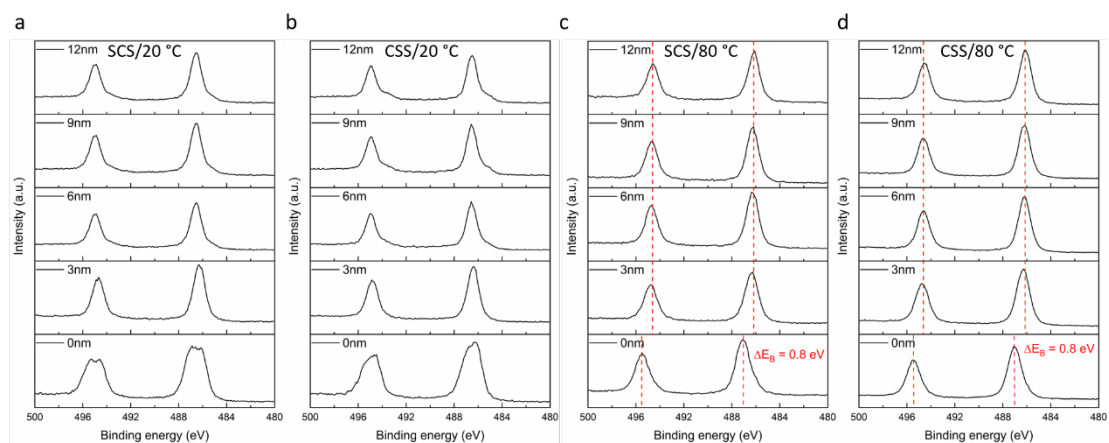

**Figure S11. XPS depth profile of Sn 3d (Tin) for CsSnI<sub>3</sub> thin films (from 0 to 12 nm).**  
**(a)** SCS film oxidised at 20 °C **(b)** CSS film oxidised at 20 °C **(c)** SCS oxidised at 80 °C **(d)** CSS oxidised at 80 °C.

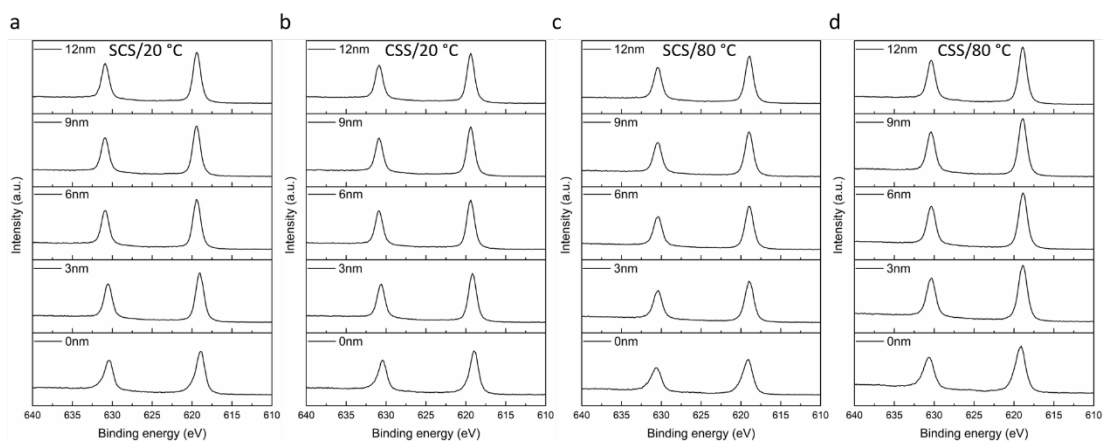

**Figure S12. XPS depth profile of I 3d (Iodide) for CsSnI<sub>3</sub> thin films (from 0 to 12 nm).**  
**(a)** SCS film oxidised at 20 °C **(b)** CSS film oxidised at 20 °C **(c)** SCS oxidised at 80 °C **(d)** CSS oxidised at 80 °C.

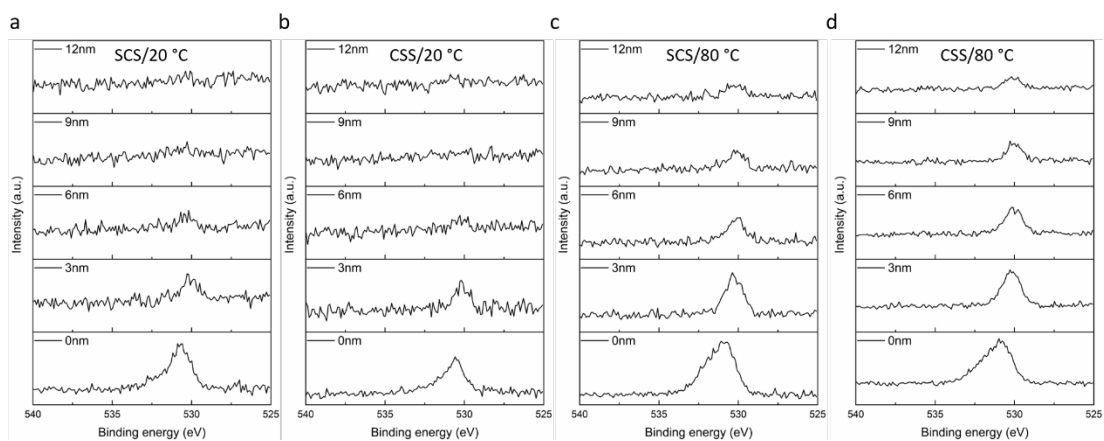

**Figure S13. XPS depth profile of O 1s (Oxygen) for CsSnI<sub>3</sub> thin films (from 0 to 12 nm). (a) SCS film oxidised at 20 °C (b) CSS film oxidised at 20 °C (c) SCS oxidised at 80 °C (d) CSS oxidised at 80 °C.**

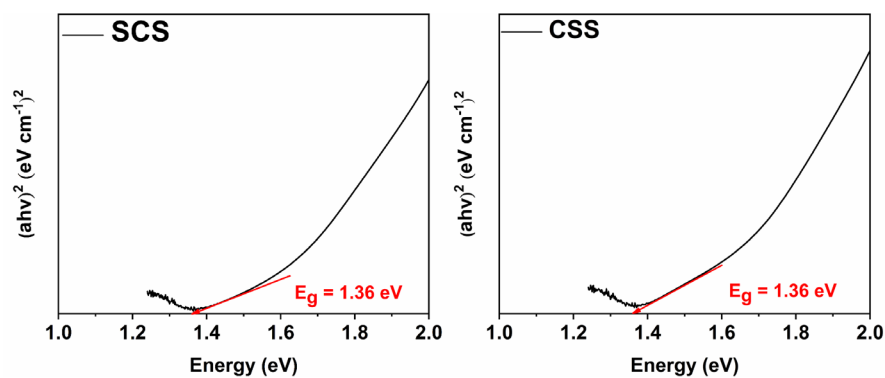

**Figure S14** Tauc plots of the absorption spectra of SCS and CSS  $\text{CsSnI}_3$  thin films, confirming a band gap of 1.36 eV in both cases.



Table S1: Auger peaks of reference Sn metal ( $\text{Sn}^0$ ) and our  $\text{CsSnI}_3$  thin films.

| Sample<br>(ev)            | $\text{M}_5\text{N}_{4,5}\text{N}_{4,5}$ |                |                |                    |                | $\text{M}_4\text{N}_{4,5}\text{N}_{4,5}$ |                    |
|---------------------------|------------------------------------------|----------------|----------------|--------------------|----------------|------------------------------------------|--------------------|
|                           | peak a                                   | peak b         |                |                    |                | peak c                                   | peak d             |
|                           | $^1\text{S}_0$                           | $^1\text{G}_4$ | $^3\text{P}_2$ | $^3\text{F}_{2,3}$ | $^3\text{F}_4$ | $^1\text{G}_4^1\text{D}_2$               | $^3\text{F}_{2,3}$ |
| Barlow* Ref. <sup>1</sup> | 421.3                                    | 425.6          | 426.8          | 427.9              | 428.7          | 434.1                                    | 436.3              |
| Pessa Ref. <sup>2</sup>   | 422.9                                    | 425.6          |                | 427.6              |                | 434.1                                    |                    |
| SCS-20(0nm)               | 422.5                                    | 426.4          |                |                    |                | 432.7                                    | 436.1              |
| SCS-20(3nm)               | 421.5                                    | 427.2          |                |                    |                | 433.1                                    | 435.3              |
| SCS-20(6nm)               | 421.2                                    | 427.8          |                |                    |                |                                          | 435.3              |
| SCS-20(9nm)               | 421.3                                    | 428            |                |                    |                |                                          | 435.6              |
| SCS-20(12nm)              | 421.1                                    | 428            |                |                    |                |                                          | 435.5              |
| CSS-20(0nm)               | 422.8                                    | 426.7          |                |                    |                | 432.7                                    | 435.6              |
| CSS-20(3nm)               | 421.2                                    | 427.7          |                |                    |                | 433.4                                    | 435.8              |
| CSS-20(6nm)               | 421.3                                    | 428.1          |                |                    |                |                                          | 435.5              |
| CSS-20(9nm)               | 421.3                                    | 428.3          |                |                    |                |                                          | 435.6              |
| CSS-20(12nm)              | 421.6                                    | 428.2          |                |                    |                |                                          | 435.6              |
| SCS-80(0nm)               | 422.5                                    | 425.5          |                |                    |                | 432                                      | 434.7              |
| SCS-80(3nm)               | 421.3                                    | 426.4          |                |                    |                | 433.4                                    | 435.6              |
| SCS-80(6nm)               | 421.7                                    | 426.8          |                |                    |                | 433.7                                    | 435.9              |
| SCS-80(9nm)               | 421.8                                    | 427.2          |                |                    |                |                                          | 435                |
| SCS-80(12nm)              | 421.6                                    | 428            |                |                    |                |                                          | 435.6              |
| CSS-80(0nm)               | 423.1                                    | 425.5          |                |                    |                | 432.4                                    | 435.5              |
| CSS-80(3nm)               | 421.3                                    | 426.5          |                |                    |                | 433.6                                    | 436.2              |
| CSS-80(6nm)               | 421.5                                    | 426.9          |                |                    |                | 433.9                                    | 435.8              |
| CSS-80(9nm)               | 421.6                                    | 427.2          |                |                    |                |                                          | 435                |
| CSS-80(12nm)              | 421.8                                    | 427.7          |                |                    |                |                                          | 435.4              |

**Table S2: Experimental binding, Auger kinetic energy values and Auger parameter for SCS and CSS films compare to references.**

| Sample           | $E_b$ 3d <sub>5/2</sub><br>(ev) | * $\Delta E_b$<br>3d <sub>5/2</sub> (oxide-metal) (ev) | $E_k$ M <sub>5</sub> N <sub>45</sub> N <sub>45</sub><br>(ev) | * $\Delta E_k$ (oxide-metal) (ev) | $\alpha'$ (ev) | Ref.         |
|------------------|---------------------------------|--------------------------------------------------------|--------------------------------------------------------------|-----------------------------------|----------------|--------------|
| Sn-metal         | 483.8                           |                                                        | 431.6                                                        |                                   | 915.4          | <sup>3</sup> |
| Sn-metal         | 484.9                           |                                                        | 430                                                          |                                   | 914.9          | <sup>4</sup> |
| SnO              | 486.4                           | 2.6                                                    | 426.2                                                        | 5.4                               | 912.6          | <sup>4</sup> |
| SnO <sub>2</sub> | 487.1                           | 3.3                                                    | 424.1                                                        | 7.5                               | 911.2          | <sup>4</sup> |
| SCS-20(0nm)      | 486.6                           | 2.8                                                    | 426.4                                                        | 5.2                               | 913.0          | This work    |
| SCS-20(3nm)      | 486.4                           | 2.6                                                    | 427.2                                                        | 4.4                               | 913.6          | This work    |
| SCS-20(6nm)      | 486.6                           | 2.8                                                    | 427.8                                                        | 3.8                               | 914.4          | This work    |
| SCS-20(9nm)      | 486.6                           | 2.8                                                    | 428.0                                                        | 3.6                               | 914.6          | This work    |
| SCS-20(12nm)     | 486.6                           | 2.8                                                    | 428.0                                                        | 3.6                               | 914.6          | This work    |
| CSS-20(0nm)      | 486.4                           | 2.6                                                    | 426.7                                                        | 4.9                               | 913.1          | This work    |
| CSS-20(3nm)      | 486.5                           | 2.7                                                    | 427.7                                                        | 3.9                               | 914.2          | This work    |
| CSS-20(6nm)      | 486.6                           | 2.8                                                    | 428.1                                                        | 3.5                               | 914.7          | This work    |
| CSS-20(9nm)      | 486.6                           | 2.8                                                    | 428.3                                                        | 3.3                               | 914.9          | This work    |
| CSS-20(12nm)     | 486.6                           | 2.8                                                    | 428.2                                                        | 3.4                               | 914.8          | This work    |
| SCS-80(0nm)      | 487.1                           | 3.3                                                    | 425.5                                                        | 6.1                               | 912.6          | This work    |
| SCS-80(3nm)      | 486.3                           | 2.5                                                    | 426.4                                                        | 5.2                               | 912.7          | This work    |
| SCS-80(6nm)      | 486.4                           | 2.6                                                    | 426.8                                                        | 4.8                               | 913.2          | This work    |
| SCS-80(9nm)      | 486.2                           | 2.4                                                    | 427.2                                                        | 4.4                               | 913.4          | This work    |
| SCS-80(12nm)     | 486.3                           | 2.5                                                    | 428.0                                                        | 3.6                               | 914.3          | This work    |
| CSS-80(0nm)      | 487.1                           | 3.3                                                    | 425.5                                                        | 6.1                               | 912.6          | This work    |
| CSS-80(3nm)      | 486.3                           | 2.5                                                    | 426.5                                                        | 5.1                               | 912.8          | This work    |
| CSS-80(6nm)      | 486.2                           | 2.4                                                    | 426.9                                                        | 4.7                               | 913.1          | This work    |
| CSS-80(9nm)      | 486.2                           | 2.4                                                    | 427.2                                                        | 4.4                               | 913.4          | This work    |
| CSS-80(12nm)     | 486.1                           | 2.3                                                    | 427.5                                                        | 3.9                               | 913.8          | This work    |

**Supporting References**

1. S. Barlow, P. Bayat-Mokhtari and T. E. Gallon, *Journal of Physics C: Solid State Physics*, 1979, **12**, 5577-5584.
2. M. Pessa, S. Aksela and M. Karras, *Physics Letters A*, 1970, **31**, 382-383.
3. A. F. Lee and R. M. Lambert, *Physical Review B*, 1998, **58**, 4156-4165.
4. L. Kövér, Z. Kovács, R. Sanjinés, G. Moretti, I. Cserny, G. Margaritondo, J. Pálinkás and H. Adachi, *Surface and Interface Analysis*, 1995, **23**, 461-466.
